# Supplementary material
Source: MDPI journal article supplement (https://www.mdpi.com/1424-2818/15/10/1081)
Supplement: s1 [file s1]

## Appendices:

Table S1: Floristic analysis of the studied region at different elevations

| Family         | Species                                                        | Life form | Chorotype          | Lifespan | Growth form | Ele 6 (100mtr) | Ele 5 (200mtr) | Ele 4 (400mtr) | Ele 3 (600mtr) | Ele 2 (800mtr) | Ele 1 (1000mtr) |
|----------------|----------------------------------------------------------------|-----------|--------------------|----------|-------------|----------------|----------------|----------------|----------------|----------------|-----------------|
| Acanthaceae    | <i>Blepharis ciliaris</i> (L.) B.L.Burt                        | CH        | IT + SS + SZ       | Per      | Herb        | √              | 0              | 0              | 0              | √              | √               |
| Aizoaceae      | <i>Aizoon canariense</i> L.                                    | TH        | SZ                 | Ann      | Herb        | 0              | 0              | 0              | 0              | √              | √               |
| Amaranthaceae  | <i>Aerva javanica</i> (Burm.f.) Juss. ex Schultes              | CH        | PAL                | Per      | Shrublet    | 0              | √              | 0              | 0              | √              | √               |
| Apiaceae       | <i>Pycnocycla saxatilis</i> Danin, Hedge & Lamond              | CH        | SA                 | Per      | Shrublet    | 0              | 0              | 0              | 0              | 0              | √               |
|                | <i>Ferula sinaica</i> Boiss.                                   | Hem       | IT                 | Per      | Herb        | 0              | 0              | 0              | 0              | √              | 0               |
| Apocynaceae    | <i>Rhazya stricta</i> Decne.                                   | CH        | SS + SZ            | Per      | Shrub       | √              | √              | √              | √              | 0              | √               |
| Asclepiadaceae | <i>Gomphocarpus sinaicus</i> Boiss.                            | CH        | SA                 | Per      | Shrublet    | 0              | 0              | 0              | 0              | 0              | √               |
|                | <i>Pergularia tomentosa</i> L.                                 | CH        | SS + SZ            | Per      | Shrublet    | 0              | 0              | √              | 0              | √              | √               |
|                | <i>Leptadenia pyrotechnica</i> (Forssk.) Decne.                | PH        | SS                 | Per      | Shrub       | 0              | 0              | √              | √              | √              | 0               |
| Asteraceae     | <i>Achillea fragrantissima</i> (Forssk.) Sch.Bip.              | CH        | IT + SS            | Per      | Shrublet    | 0              | 0              | 0              | 0              | 0              | √               |
|                | <i>Artemisia sieberi</i> Besser                                | CH        | IT                 | Per      | Shrublet    | 0              | 0              | 0              | 0              | 0              | √               |
|                | <i>Pulicaria incisa</i> (Lam.) DC                              | CH        | SS + SZ            | Per      | Herb        | 0              | 0              | √              | 0              | √              | √               |
|                | <i>Carthamus persicus</i> Willd.                               | Hem       | IT                 | Ann      | Herb        | 0              | 0              | 0              | 0              | √              | 0               |
|                | <i>Iphionia scabra</i> DC.                                     | CH        | SA                 | Per      | Herb        | √              | 0              | 0              | 0              | √              | 0               |
| Boraginaceae   | <i>Arnebia hispidissima</i> (Lehm.) DC                         | TH        | SS + SZ            | Ann      | Herb        | 0              | √              | 0              | 0              | 0              | 0               |
|                | <i>Heliotropium curassavicum</i> L.                            | CH        | AM                 | Per      | Herb        | √              | 0              | 0              | 0              | 0              | 0               |
| Brassicaceae   | <i>Zilla Spinosa</i> (L.) Prantl                               | CH        | ES +IT + ME +SS    | Per      | Shrub       | 0              | 0              | 0              | 0              | 0              | √               |
|                | <i>Anastatica hierochuntica</i> L.                             | TH        | SA                 | Ann      | Herb        | √              | 0              | 0              | 0              | 0              | 0               |
| Capparaceae    | <i>Capparis cartilaginea</i> Decne.                            | PH        | SUD                | Per      | Shrub       | 0              | 0              | 0              | 0              | √              | 0               |
|                | <i>Capparis decidua</i> (Forssk.) Edgew.                       | PH        | SS+SZ+SUD          | Per      | Tree        | √              | 0              | √              | 0              | 0              | 0               |
|                | <i>Maerua crassifolia</i> Forssk.                              | PH        | SA+SS              | Per      | Tree        | √              | 0              | 0              | 0              | 0              | 0               |
| Chenopodiaceae | <i>Haloxylon salicornicum</i> (Moq.) Bunge                     | CH        | SS                 | Per      | Shrub       | √              | √              | √              | √              | √              | √               |
|                | <i>Salsola jordanicola</i> Eig                                 | CH        | SA                 | Ann      | Shrublet    | 0              | 0              | 0              | 0              | √              | √               |
|                | <i>Arthrocnemum macrostachyum</i> (Moric.) K. Koch             | CH        | ME + SA            | Per      | Shrub       | √              | 0              | 0              | 0              | 0              | 0               |
|                | <i>Seidlitzia rosmarinus</i> Bunge ex Boiss.                   | CH        | SA                 | Per      | Shrub       | √              | 0              | 0              | 0              | 0              | 0               |
|                | <i>Traganum nudatum</i> Delile                                 | CH        | SA                 | Per      | Shrublet    | √              | 0              | 0              | 0              | 0              | 0               |
| Cleomaceae     | <i>Cleome arabica</i> L.                                       | CH        | SUD                | Per      | Herb        | 0              | 0              | 0              | 0              | 0              | √               |
|                | <i>Cleome droserifolia</i> (Forssk.) Del.                      | CH        | SUD                | Per      | Shrublet    | 0              | √              | √              | 0              | 0              | 0               |
| Cucurbitaceae  | <i>Citrullus colocynthis</i> (L.) Schrad                       | Hem       | IT + ME + SS+ + SZ | Per      | Vine        | √              | 0              | √              | 0              | 0              | √               |
| Cyperaceae     | <i>Cyperus bulbosus</i> Vahl                                   | GE        | COSM               | Per      | Herb        | √              | 0              | 0              | 0              | 0              | 0               |
| Euphorbiaceae  | <i>Chrozophora oblongifolia</i> (Delile) A.Juss. ex Spreng.    | CH        | SZ                 | Per      | Herb        | √              | 0              | 0              | 0              | 0              | √               |
| Fabaceae       | <i>Retama raetam</i> (Forssk.) Webb.                           | PH        | SS                 | Per      | Shurb       | 0              | 0              | 0              | 0              | 0              | √               |
|                | <i>Vachellia gerrardii</i> (Benth.)                            | PH        | SUD                | Per      | Tree        | 0              | 0              | 0              | 0              | 3.7            | √               |
|                | <i>Vachellia tortilis</i> (Forssk.)                            | PH        | SUD + SZ           | Per      | Tree        | √              | v              | √              | √              | √              | 0               |
|                | <i>Vachellia tortilis</i> subsp. <i>raddiana</i> (Savi) Brenan | PH        | SUD + SZ           | Per      | Tree        | √              | √              | √              | √              | √              | 0               |
|                | <i>Medicago laciniata</i> var. <i>brachyacantha</i> Boiss.     | TH        | SS                 | Ann      | Herb        | 0              | √              | 0              | 0              | 0              | 0               |
|                | <i>Senna holosericea</i> (Fresen) Greuter                      | CH        | SS+SUD             | Per      | Herb        | 0              | √              | 0              | 0              | 0              | 0               |
|                | <i>Tephrosia purpurea</i> ssp. <i>apollinea</i> (Del.) Hosni   | CH        | SS + SZ            | Per      | Herb        | 0              | √              | 0              | 0              | 0              | 0               |
|                | <i>Vachellia flava</i> (Forssk.) Kyal. & Boatwr                | PH        | SA+SZ              | Per      | Shrub       | √              | 0              | 0              | 0              | 0              | 0               |
|                | <i>Vachellia oeforta</i> (Forssk) Kyal. & Boatwr               | PH        | SA+SZ              | Per      | Shrub       | √              | 0              | 0              | 0              | 0              | 0               |
| Geraniaceae    | <i>Erodium oxyrhinchum</i> M.Bieb.                             | TH        | SS + SZ            | Ann      | Herb        | √              | 0              | 0              | 0              | 0              | 0               |
| Lamiaceae      | <i>Lavandula pubescens</i> Decne.                              | CH        | SS + SZ            | Per      | Herb        | 0              | 0              | 0              | 0              | √              | √               |
|                | <i>Lavandula coronopifolia</i> Poir                            | CH        | SS + SZ            | Per      | Herb        | 0              | 0              | 0              | 0              | √              | 0               |
| Loranthaceae   | <i>Plicosepalus acaciae</i> (Zucc.) Wiens & Polhill            | Epi       | SUD                | Per      | Mistletoe   | √              | 0              | 0              | 0              | √              | 0               |
| Malvaceae      | <i>Abutilon bidentatum</i> A. Rich.                            | CH        | SUD                | Per      | Shrub       | 0              | 0              | 0              | 0              | √              | 0               |

|                |                                                         |     |              |     |          |   |   |   |   |   |   |
|----------------|---------------------------------------------------------|-----|--------------|-----|----------|---|---|---|---|---|---|
| Menispermaceae | <i>Cocculus pendulus (J.R. &amp; G. Forster) Diels</i>  | CH  | SUD          | Per | Climber  | √ | 0 | 0 | 0 | √ | 0 |
| Moraceae       | <i>Ficus cordata ssp. salicifolia (Vahl) C.C. Berg.</i> | PH  | SUD          | Per | Tree     | 0 | 0 | 0 | 0 | √ | 0 |
| Nitrariaceae   | <i>Nitraria retusa (Forssk.) Asch</i>                   | PH  | SA           | Per | Shrub    | √ | 0 | 0 | 0 | 0 | 0 |
| Palmae         | <i>Hyphaene thebaica (L.) Mart.</i>                     | PH  | SUD          | Per | Tree     | √ | √ | 0 | 0 | √ | 0 |
|                | <i>Phoenix caespitosa Chiov.</i>                        | PH  | SA           | Per | Shrub    | 0 | 0 | 0 | 0 | √ | 0 |
| Poaceae        | <i>Leptochloa fusca (L.) Kunth.</i>                     | Hem | PAL          | Per | Grass    | 0 | 0 | 0 | 0 | 0 | √ |
|                | <i>Stipa capensis Thunb.</i>                            | TH  | IT + SS      | Ann | Grass    | 0 | 0 | 0 | 0 | 0 | √ |
|                | <i>Panicum turgidum Forssk.</i>                         | CR  | SS + SZ      | Per | Grass    | √ | 0 | 0 | 0 | √ | 0 |
|                | <i>Phragmites australis (Cav.) Trin. Ex. Steudel</i>    | GE  | COSM         | Per | Grass    | √ | 0 | 0 | 0 | √ | 0 |
|                | <i>Aeluropus lagopoides (L.) Thwaites</i>               | Hem | IT+ SA       | Per | Grass    | √ | 0 | 0 | 0 | 0 | 0 |
|                | <i>Lasiurus scindicus Henrard</i>                       | Hem | SA+SS        | Per | Grass    | √ | 0 | 0 | 0 | 0 | 0 |
|                | <i>Stipagrostis plumosa (L.) Munro ex T. Anderson</i>   | Hem | IT + SA      | Per | Grass    | √ | 0 | 0 | 0 | 0 | 0 |
| Resedaceae     | <i>Ochradenus baccatus Del.</i>                         | PH  | SS           | Per | Shrub    | √ | √ | 0 | √ | √ | √ |
|                | <i>Reseda muricata C. Presl</i>                         | CH  | SS           | Per | Herb     | 0 | 0 | 0 | 0 | 0 | √ |
| Rhamnaceae     | <i>Ziziphus spina-christi (L.) Desf.</i>                | PH  | SS + SZ      | Per | Tree     | 0 | √ | 0 | 0 | √ | 0 |
| Salvadoraceae  | <i>Salvadora persica L.</i>                             | PH  | SUD          | Per | Tree     | √ | 0 | 0 | 0 | 0 | 0 |
| Solanaceae     | <i>Hyoscyamus muticus L.</i>                            | CH  | SA           | Per | Herb     | √ | 0 | 0 | 0 | 0 | √ |
|                | <i>Lycium shawii Roem &amp; Schult</i>                  | PH  | SS + SZ      | Per | Shrub    | √ | √ | √ | √ | √ | √ |
| Tamaricaceae   | <i>Tamarix nilotica (Ehrenb.) Bunge</i>                 | PH  | SUD + SZ     | Per | Tree     | √ | √ | 0 | 0 | 0 | 0 |
|                | <i>Tamarix aphylla (L.) Karst</i>                       | PH  | IT + SS + SZ | Per | Tree     | √ | 0 | 0 | 0 | 0 | 0 |
| Urticaceae     | <i>Forsskaolea tenacissima L.</i>                       | CH  | SS + SZ      | Per | Herb     | 0 | 0 | √ | 0 | √ | √ |
| Verbenaceae    | <i>Avicennia marina (Forssk.) Vierh.</i>                | PH  | TP           | Per | Shrub    | √ | 0 | 0 | 0 | 0 | 0 |
| Zygophyllaceae | <i>Fagonia indica Burm.f.</i>                           | Hem | SA+IT+SUD    | Per | Herb     | 0 | 0 | 0 | 0 | √ | √ |
|                | <i>Peganum harmala L.</i>                               | Hem | IT + ME + SS | Per | Herb     | 0 | 0 | 0 | 0 | 0 | √ |
|                | <i>Zygophyllum coccineum L.</i>                         | CH  | SA           | Per | Shrublet | √ | 0 | 0 | 0 | 0 | 0 |

Table S2: Species domination (IVs) of the studied region at different elevations, values are the average of the important values of species based on the relative cover and density.

| No | Botanical name                                              | Habitats |       |       |       |       |       |
|----|-------------------------------------------------------------|----------|-------|-------|-------|-------|-------|
|    |                                                             | Ele 6    | Ele 5 | Ele 4 | Ele 3 | Ele 2 | Ele 1 |
| 1  | <i>Abutilon bidentatum</i> A. Rich.                         | -        | -     | -     | -     | 1.92  | -     |
| 2  | <i>Achillea fragrantissima</i> (Forssk.) Sch.Bip.           | -        | -     | -     | -     | -     | 4.43  |
| 3  | <i>Aeluropus lagopoides</i> (L.) Thwaites                   | 4.92     | -     | -     | -     | -     | -     |
| 4  | <i>Aerva javanica</i> (Burm.f.) Juss. ex Schultes           | -        | 13.21 | -     | -     | 8.54  | 7.09  |
| 5  | <i>Aizoon canariense</i> L.                                 | -        | -     | -     | -     | 4.22  | 4.79  |
| 6  | <i>Anastatica hierochuntica</i> L.                          | 4.88     | -     | -     | -     | -     | -     |
| 7  | <i>Arnebia hispidissima</i> (Lehm.) DC                      | -        | 13.99 | -     | -     | -     | -     |
| 8  | <i>Artemisia sieberi</i> Besser                             | -        | -     | -     | -     | -     | 3.59  |
| 9  | <i>Arthrocnemum macrostachyum</i> (Moric.) K. Koch          | 7.32     | -     | -     | -     | -     | -     |
| 10 | <i>Avicennia marina</i> (Forssk.) Vierh.                    | 8.06     | -     | -     | -     | -     | -     |
| 11 | <i>Blepharis ciliaris</i> (L.) B.L.Burt                     | 5.38     | -     | -     | -     | 6.89  | 5.97  |
| 12 | <i>Capparis cartilaginea</i> Decne.                         | -        | -     | -     | -     | -     | -     |
| 13 | <i>Capparis decidua</i> (Forssk.) Edgew.                    | 3.05     | 0     | 3.52  | -     | -     | -     |
| 14 | <i>Carthamus persicus</i> Willd.                            | -        | -     | -     | -     | 2.44  | -     |
| 15 | <i>Chrozophora oblongifolia</i> (Delile) A.Juss. ex Spreng. | 3.5      | -     | -     | -     | -     | 3.79  |
| 16 | <i>Citrullus colocynthis</i> (L.) Schrad                    | 4.39     | -     | 8.63  | -     | -     | 8.06  |
| 17 | <i>Cleome arabica</i> L.                                    | -        | -     | -     | -     | -     | 3.56  |
| 18 | <i>Cleome droserifolia</i> (Forssk.) Del.                   | -        | 18.4  | 27.64 | -     | -     | -     |
| 19 | <i>Cocculus pendulus</i> (J.R. & G. Forster) Diels          | 1.65     | -     | -     | -     | 4.83  | -     |
| 20 | <i>Cyperus bulbosus</i> Vahl                                | 6.89     | -     | -     | -     | -     | -     |
| 21 | <i>Erodium oxyrhinchum</i> M.Bieb.                          | 1.34     | -     | -     | -     | -     | -     |
| 22 | <i>Fagonia indica</i> Burm.f.                               | -        | -     | -     | -     | 7.5   | 8.35  |
| 23 | <i>Ferula sinaica</i> Boiss.                                | -        | -     | -     | -     | 2.47  | -     |
| 24 | <i>Ficus cordata</i> ssp.salicifolia (Vahl) C.C. Berg.      | -        | -     | -     | -     | 3.07  | -     |
| 25 | <i>Forsskaolea tenacissima</i> L.                           | -        | -     | 11.08 | -     | 7.33  | 10.38 |
| 26 | <i>Gomphocarpus sinaicus</i> Boiss.                         | -        | -     | -     | -     | -     | 6.86  |
| 27 | <i>Haloxylon salicornicum</i> (Moq.) Bunge                  | 25.45    | 37.76 | 56.52 | 95.06 | 44.24 | 50.02 |
| 28 | <i>Heliotropium curassavicum</i> L.                         | 6.08     | -     | -     | -     | -     | -     |
| 29 | <i>Hyoscyamus muticus</i> L.                                | 6.08     | -     | -     | -     | -     | 3.04  |
| 30 | <i>Hyphaene thebaica</i> (L.) Mart.                         | 11.23    | 14.63 | -     | -     | 8.32  | -     |
| 31 | <i>Iphiona scabra</i> DC.                                   | 6.35     | -     | -     | -     | 6.94  | -     |
| 32 | <i>Lasiurus scindicus</i> Henrard                           | 8.93     | -     | -     | -     | -     | -     |
| 33 | <i>Lavandula coronopifolia</i> Poir                         | -        | -     | -     | -     | 2.82  | -     |
| 34 | <i>Lavandula pubescens</i> Decne.                           | -        | -     | -     | -     | 5.85  | 4.09  |
| 35 | <i>Leptadenia pyrotechnica</i> (Forssk.) Decne.             | -        | -     | 25.72 | 33.03 | 23.03 | -     |
| 36 | <i>Leptochloa fusca</i> (L.) Kunth.                         | -        | -     | -     | -     | -     | 2.13  |
| 37 | <i>Lycium shawii</i> Roem & Schult                          | 11.77    | 8.62  | 14.47 | 27.86 | 20.83 | 19.05 |
| 38 | <i>Maerua crassifolia</i> Forssk.                           | 3.98     | -     | -     | -     | -     | -     |
| 39 | <i>Medicago laciniata</i> var. <i>brachyacantha</i> Boiss.  | 0        | 9.02  | -     | -     | -     | -     |
| 40 | <i>Nitraria retusa</i> (Forssk.) Asch                       | 7.22     | -     | -     | -     | -     | -     |
| 41 | <i>Ochradenus baccatus</i> Del.                             | 3.13     | 5.64  | -     | 18.74 | 23.51 | 11.83 |
| 42 | <i>Panicum turgidum</i> Forssk.                             | 7.76     | -     | -     | -     | 5.35  | -     |
| 43 | <i>Peganum harmala</i> L.                                   | -        | -     | -     | -     | -     | 2.23  |
| 44 | <i>Pergularia tomentosa</i> L.                              | -        | -     | 6.31  | -     | 9.18  | 6.46  |
| 45 | <i>Phoenix caespitosa</i> Chiov.                            | -        | -     | 0     | -     | 3.63  | -     |
| 46 | <i>Phragmites australis</i> (Cav.) Trin. Ex. Steudel        | 4.68     | -     | 0     | -     | 7.18  | -     |
| 47 | <i>Plicosepalus acaciae</i> (Zucc.) Wiens & Polhill         | 8.07     | -     | 0     | -     | 9.33  | -     |

|    |                                                         |       |       |       |       |       |       |
|----|---------------------------------------------------------|-------|-------|-------|-------|-------|-------|
| 48 | <i>Pulicaria incisa (Lam.) DC</i>                       | -     | -     | 4.81  | -     | 4.49  | 4.47  |
| 49 | <i>Pycnocycla saxatilis Danin, Hedge &amp; Lamond</i>   | -     | -     | -     | -     | -     | 1.52  |
| 50 | <i>Reseda muricata C.Presl</i>                          | -     | -     | -     | -     | -     | 2.02  |
| 51 | <i>Retama raetam (Forssk.) Webb.</i>                    | -     | -     | -     | -     | -     | 36.29 |
| 52 | <i>Rhazya stricta Decne.</i>                            | 19.44 | 30.95 | 52.56 | 64.64 | -     | 29.57 |
| 53 | <i>Salsola jordanicola Eig</i>                          | -     | -     | -     | -     | 1.71  | 3.14  |
| 54 | <i>Salvadora persica L.</i>                             | 8.64  | -     | -     | -     | -     | -     |
| 55 | <i>Seidlitzia rosmarinus Bunge ex Boiss.</i>            | 4.82  | -     | -     | -     | -     | -     |
| 56 | <i>Senna holosericea (Fresen) Greuter</i>               | 0     | 25.33 | -     | -     | -     | -     |
| 57 | <i>Stipa capensis Thunb.</i>                            | 0     | 0     | -     | -     | -     | 2.16  |
| 58 | <i>Stipagrostis plumosa (L.) Munro ex T.Anderson</i>    | 2.73  | 0     | -     | -     | -     | -     |
| 59 | <i>Tamarix aphylla (L.) Karst</i>                       | 7.05  | 0     | -     | -     | -     | -     |
| 60 | <i>Tamarix nilotica (Ehrenb.) Bunge</i>                 | 14.51 | 33.68 | -     | -     | -     | -     |
| 61 | <i>Tephrosia purpurea ssp. apollinea (Del.) Hosni</i>   | -     | 21.13 | -     | -     | -     | -     |
| 62 | <i>Traganum nudatum Delile</i>                          | 1.43  | -     | -     | -     | -     | -     |
| 63 | <i>Vachellia flava (Forssk.) Kyal. &amp; Boatwr</i>     | 4.19  | -     | -     | -     | -     | -     |
| 64 | <i>Vachellia gerrardii (Benth.)</i>                     | 0     | -     | -     | -     | 3.7   | 19.64 |
| 65 | <i>Vachellia oeffortia (Forssk) Kyal. &amp; Boatwr</i>  | 2.05  | -     | -     | -     | -     | -     |
| 66 | <i>Vachellia tortilis (Forssk.)</i>                     | 32.62 | 34.72 | 49.86 | 37.23 | 26.41 | -     |
| 67 | <i>Vachellia tortilis subsp. raddiana (Savi) Brenan</i> | 16.79 | 29.46 | 38.83 | 23.4  | 27.49 | -     |
| 68 | <i>Zilla Spinosa (L.) Prantl</i>                        | -     | -     | -     | -     | -     | 35.47 |
| 69 | <i>Ziziphus spina-christi (L.) Desf.</i>                | -     | 3.32  | -     | -     | 13.77 | -     |
| 70 | <i>Zygophyllum coccineum L.</i>                         | 23.44 | -     | -     | -     | -     | -     |
